# Supplementary material
Source: publisher figshare collection journal article supplement (https://frontiersin.figshare.com/ndownloader/files/22437287)
Supplement: Supplementary file [file 22437287]

| Primers                      | Name                                                     | Sequence                                                                                           | Segment                                     | Amplicon size(bp) |
|------------------------------|----------------------------------------------------------|----------------------------------------------------------------------------------------------------|---------------------------------------------|-------------------|
| Diagnostic (Partial VP6)     | VP6F<br>VP6R                                             | ACAGTATTCAGCCAGGDTTTC<br>AGCCACATAGTTCACATTTCATC                                                   | 1095-1116                                   | 260               |
| Amplification and sequencing | RV0104VP41F<br>RV0104VP41R<br>RV0104VP42F<br>RV0104VP42R | ATGGCGTCCTCACTTTA<br>AAGCTGGTCTCCTCACTGATTAAAT<br>GATTATTGGGACGATTCAG<br>AAGCTGGTCTCCTCACTGATTAAAT | 1-17<br>1192-1211<br>1075-1092<br>2208-2232 | 1211<br><br>1157  |
|                              |                                                          |                                                                                                    |                                             |                   |
